# Supplementary material
Source: publisher site journal article supplement (https://mbmg.pensoft.net/article/78871/download/suppl/31/)
Supplement: Supplementary file 1

## Sheet: Community A
Species	Number used	Weight (mg)	% biomass	% abundance
Acheta domesticus	1	13.4	1.8807	1.35135
Aphidius colemani	5	4	0.561404	6.75676
Aphidius ervi	1	1.4	0.196491	1.35135
Aphidoletes aphidimyza	4	6	0.842105	5.40541
Blaptica dubia	3	69.7	9.78246	4.05405
Chrysoperla carnea	2	1.2	0.168421	2.7027
Cryptolaemus montrouzieri	4	44.7	6.27368	5.40541
Dacnusa sibirica	11	12.6	1.76842	14.8649
Dermestes haemorrhoidalis	1	44.1	6.18947	1.35135
Drosophila hydei	12	44	6.17544	16.2162
Drosophila melanogaster	6	10.4	1.45965	8.10811
Drosophila simulans	3	5.1	0.715789	4.05405
Drosophila yakuba	3	5.9	0.82807	4.05405
Encarsia formosa	4	0.5	0.0701754	5.40541
Folsomia candida	2	0.5	0.0701754	2.7027
Formica lemani	1	8	1.12281	1.35135
Formica rufa	3	50.3	7.05965	4.05405
Locusta migratoria	1	115.8	16.2526	1.35135
Macrolophus pygmaeus	3	6.5	0.912281	4.05405
Polygonia c-album	1	246.2	34.5544	1.35135
Porcellionides pruinosus	1	20.7	2.90526	1.35135
Tuberculatus annulatus	2	1.5	0.210526	2.7027
Calliphora vomitoria	0	0	0	0
Total	74	712.5	100	100

## Sheet: Community B
Species	Number used	Weight (mg)	% biomass	% abundance
Acheta domesticus	1	13.4	1.63574	1.40845
Aphidius colemani	5	4	0.488281	7.04225
Aphidius ervi	1	1.4	0.170898	1.40845
Aphidoletes aphidimyza	4	6	0.732422	5.6338
Blaptica dubia	3	69.7	8.5083	4.22535
Calliphora vomitoria	1	107.2	13.0859	1.40845
Chrysoperla carnea	2	1.2	0.146484	2.8169
Cryptolaemus montrouzieri	4	44.7	5.45654	5.6338
Dacnusa sibirica	11	12.6	1.53809	15.493
Dermestes haemorrhoidalis	1	44.1	5.3833	1.40845
Drosophila hydei	12	44	5.37109	16.9014
Drosophila melanogaster	6	10.4	1.26953	8.4507
Drosophila simulans	3	5.1	0.622559	4.22535
Drosophila yakuba	3	5.9	0.720215	4.22535
Folsomia candida	2	0.5	0.0610352	2.8169
Formica lemani	1	8	0.976562	1.40845
Formica rufa	3	50.3	6.14014	4.22535
Locusta migratoria	1	115.8	14.1357	1.40845
Macrolophus pygmaeus	3	6.5	0.793457	4.22535
Polygonia c-album	1	246.2	30.0537	1.40845
Porcellionides pruinosus	1	20.7	2.52686	1.40845
Tuberculatus annulatus	2	1.5	0.183105	2.8169
Encarsia formosa	0	0	0	0
Total	71	819.2	100	100

## Sheet: Community C
Species	Number used	Weight (mg)	% biomass	% abundance
Acheta domesticus	1	13.4	1.63714	1.36986
Aphidius colemani	5	4	0.488699	6.84932
Aphidius ervi	1	1.4	0.171045	1.36986
Aphidoletes aphidimyza	4	6	0.733048	5.47945
Blaptica dubia	3	69.7	8.51558	4.10959
Calliphora vomitoria	1	107.2	13.0971	1.36986
Cryptolaemus montrouzieri	4	44.7	5.46121	5.47945
Dacnusa sibirica	11	12.6	1.5394	15.0685
Dermestes haemorrhoidalis	1	44.1	5.3879	1.36986
Drosophila hydei	12	44	5.37569	16.4384
Drosophila melanogaster	6	10.4	1.27062	8.21918
Drosophila simulans	3	5.1	0.623091	4.10959
Drosophila yakuba	3	5.9	0.720831	4.10959
Encarsia formosa	4	0.5	0.0610874	5.47945
Folsomia candida	2	0.5	0.0610874	2.73973
Formica lemani	1	8	0.977398	1.36986
Formica rufa	3	50.3	6.14539	4.10959
Locusta migratoria	1	115.8	14.1478	1.36986
Macrolophus pygmaeus	3	6.5	0.794136	4.10959
Polygonia c-album	1	246.2	30.0794	1.36986
Porcellionides pruinosus	1	20.7	2.52902	1.36986
Tuberculatus annulatus	2	1.5	0.183262	2.73973
Chrysoperla carnea	0	0	0	0
Total	73	818.5	100	100

## Sheet: Community D
Species	Number used	Weight (mg)	% biomass	% abundance
Acheta domesticus	1	13.4	1.64781	1.38889
Aphidius colemani	5	4	0.491884	6.94444
Aphidius ervi	1	1.4	0.172159	1.38889
Aphidoletes aphidimyza	4	6	0.737826	5.55556
Blaptica dubia	3	69.7	8.57108	4.16667
Calliphora vomitoria	1	107.2	13.1825	1.38889
Chrysoperla carnea	2	1.2	0.147565	2.77778
Cryptolaemus montrouzieri	4	44.7	5.4968	5.55556
Dacnusa sibirica	11	12.6	1.54943	15.2778
Dermestes haemorrhoidalis	1	44.1	5.42302	1.38889
Drosophila hydei	12	44	5.41072	16.6667
Drosophila melanogaster	6	10.4	1.2789	8.33333
Drosophila simulans	3	5.1	0.627152	4.16667
Drosophila yakuba	3	5.9	0.725529	4.16667
Encarsia formosa	4	0.5	0.0614855	5.55556
Folsomia candida	2	0.5	0.0614855	2.77778
Formica lemani	1	8	0.983768	1.38889
Formica rufa	3	50.3	6.18544	4.16667
Locusta migratoria	1	115.8	14.24	1.38889
Polygonia c-album	1	246.2	30.2755	1.38889
Porcellionides pruinosus	1	20.7	2.5455	1.38889
Tuberculatus annulatus	2	1.5	0.184456	2.77778
Macrolophus pygmaeus	0	0	0	0
Total	72	813.2	100	100

## Sheet: Community E
Species	Number used	Weight (mg)	% biomass	% abundance
Acheta domesticus	1	13.4	1.78667	1.38889
Aphidius colemani	5	4	0.533333	6.94444
Aphidius ervi	1	1.4	0.186667	1.38889
Aphidoletes aphidimyza	4	6	0.8	5.55556
Calliphora vomitoria	1	107.2	14.2933	1.38889
Chrysoperla carnea	2	1.2	0.16	2.77778
Cryptolaemus montrouzieri	4	44.7	5.96	5.55556
Dacnusa sibirica	11	12.6	1.68	15.2778
Dermestes haemorrhoidalis	1	44.1	5.88	1.38889
Drosophila hydei	12	44	5.86667	16.6667
Drosophila melanogaster	6	10.4	1.38667	8.33333
Drosophila simulans	3	5.1	0.68	4.16667
Drosophila yakuba	3	5.9	0.786667	4.16667
Encarsia formosa	4	0.5	0.0666667	5.55556
Folsomia candida	2	0.5	0.0666667	2.77778
Formica lemani	1	8	1.06667	1.38889
Formica rufa	3	50.3	6.70667	4.16667
Locusta migratoria	1	115.8	15.44	1.38889
Macrolophus pygmaeus	3	6.5	0.866667	4.16667
Polygonia c-album	1	246.2	32.8267	1.38889
Porcellionides pruinosus	1	20.7	2.76	1.38889
Tuberculatus annulatus	2	1.5	0.2	2.77778
Blaptica dubia	0	0	0	0
Total	72	750	100	100

## Sheet: Community F
Species	Number used	Weight (mg)	% biomass	% abundance
Acheta domesticus	1	13.4	1.90368	1.35135
Aphidius colemani	5	4	0.568263	6.75676
Aphidius ervi	1	1.4	0.198892	1.35135
Aphidoletes aphidimyza	4	6	0.852394	5.40541
Blaptica dubia	3	69.7	9.90197	4.05405
Calliphora vomitoria	1	107.2	15.2294	1.35135
Chrysoperla carnea	2	1.2	0.170479	2.7027
Cryptolaemus montrouzieri	4	44.7	6.35033	5.40541
Dacnusa sibirica	11	12.6	1.79003	14.8649
Dermestes haemorrhoidalis	1	44.1	6.26509	1.35135
Drosophila hydei	12	44	6.25089	16.2162
Drosophila melanogaster	6	10.4	1.47748	8.10811
Drosophila simulans	3	5.1	0.724535	4.05405
Drosophila yakuba	3	5.9	0.838187	4.05405
Encarsia formosa	4	0.5	0.0710328	5.40541
Folsomia candida	2	0.5	0.0710328	2.7027
Formica lemani	1	8	1.13653	1.35135
Formica rufa	3	50.3	7.1459	4.05405
Macrolophus pygmaeus	3	6.5	0.923427	4.05405
Polygonia c-album	1	246.2	34.9766	1.35135
Porcellionides pruinosus	1	20.7	2.94076	1.35135
Tuberculatus annulatus	2	1.5	0.213098	2.7027
Locusta migratoria	0	0	0	0
Total	74	703.9	100	100

## Sheet: Community G
Species	Number used	Weight (mg)	% biomass	% abundance
Acheta domesticus	1	13.4	1.6771	1.35135
Aphidius colemani	5	4	0.500626	6.75676
Aphidius ervi	1	1.4	0.175219	1.35135
Aphidoletes aphidimyza	4	6	0.750939	5.40541
Blaptica dubia	3	69.7	8.7234	4.05405
Calliphora vomitoria	1	107.2	13.4168	1.35135
Chrysoperla carnea	2	1.2	0.150188	2.7027
Cryptolaemus montrouzieri	4	44.7	5.59449	5.40541
Dacnusa sibirica	11	12.6	1.57697	14.8649
Dermestes haemorrhoidalis	1	44.1	5.5194	1.35135
Drosophila hydei	12	44	5.50688	16.2162
Drosophila melanogaster	6	10.4	1.30163	8.10811
Drosophila simulans	3	5.1	0.638298	4.05405
Drosophila yakuba	3	5.9	0.738423	4.05405
Encarsia formosa	4	0.5	0.0625782	5.40541
Folsomia candida	2	0.5	0.0625782	2.7027
Formica lemani	1	8	1.00125	1.35135
Formica rufa	3	50.3	6.29537	4.05405
Locusta migratoria	1	115.8	14.4931	1.35135
Macrolophus pygmaeus	3	6.5	0.813517	4.05405
Polygonia c-album	1	246.2	30.8135	1.35135
Tuberculatus annulatus	2	1.5	0.187735	2.7027
Porcellionides pruinosus	0	0	0	0
Total	74	799	100	100

## Sheet: Community H
Species	Number used	Weight (mg)	% biomass	% abundance
Acheta domesticus	1	13.4	1.6466	1.38889
Aphidius colemani	5	4	0.491521	6.94444
Aphidius ervi	1	1.4	0.172032	1.38889
Aphidoletes aphidimyza	4	6	0.737282	5.55556
Blaptica dubia	3	69.7	8.56476	4.16667
Calliphora vomitoria	1	107.2	13.1728	1.38889
Chrysoperla carnea	2	1.2	0.147456	2.77778
Cryptolaemus montrouzieri	4	44.7	5.49275	5.55556
Dacnusa sibirica	11	12.6	1.54829	15.2778
Dermestes haemorrhoidalis	1	44.1	5.41902	1.38889
Drosophila hydei	12	44	5.40673	16.6667
Drosophila melanogaster	6	10.4	1.27796	8.33333
Drosophila simulans	3	5.1	0.62669	4.16667
Encarsia formosa	4	0.5	0.0614402	5.55556
Folsomia candida	2	0.5	0.0614402	2.77778
Formica lemani	1	8	0.983043	1.38889
Formica rufa	3	50.3	6.18088	4.16667
Locusta migratoria	1	115.8	14.2295	1.38889
Macrolophus pygmaeus	3	6.5	0.798722	4.16667
Polygonia c-album	1	246.2	30.2531	1.38889
Porcellionides pruinosus	1	20.7	2.54362	1.38889
Tuberculatus annulatus	2	1.5	0.18432	2.77778
Drosophila yakuba	0	0	0	0
Total	72	813.8	100	100

## Sheet: Community I
Species	Number used	Weight (mg)	% biomass	% abundance
Acheta domesticus	1	13.4	1.63774	1.36986
Aphidius colemani	5	4	0.488878	6.84932
Aphidius ervi	1	1.4	0.171107	1.36986
Aphidoletes aphidimyza	4	6	0.733317	5.47945
Blaptica dubia	3	69.7	8.5187	4.10959
Calliphora vomitoria	1	107.2	13.1019	1.36986
Chrysoperla carnea	2	1.2	0.146663	2.73973
Cryptolaemus montrouzieri	4	44.7	5.46321	5.47945
Dacnusa sibirica	11	12.6	1.53997	15.0685
Dermestes haemorrhoidalis	1	44.1	5.38988	1.36986
Drosophila hydei	12	44	5.37766	16.4384
Drosophila melanogaster	6	10.4	1.27108	8.21918
Drosophila simulans	3	5.1	0.623319	4.10959
Drosophila yakuba	3	5.9	0.721095	4.10959
Encarsia formosa	4	0.5	0.0611098	5.47945
Folsomia candida	2	0.5	0.0611098	2.73973
Formica lemani	1	8	0.977756	1.36986
Formica rufa	3	50.3	6.14764	4.10959
Locusta migratoria	1	115.8	14.153	1.36986
Macrolophus pygmaeus	3	6.5	0.794427	4.10959
Polygonia c-album	1	246.2	30.0904	1.36986
Porcellionides pruinosus	1	20.7	2.52994	1.36986
Tuberculatus annulatus	0	0	0	0
Total	73	818.2	100	100

## Sheet: Community J
Species	Number used	Weight (mg)	% biomass	% abundance
Acheta domesticus	1	13.4	1.64276	1.42857
Aphidius ervi	1	1.4	0.171632	1.42857
Aphidoletes aphidimyza	4	6	0.735565	5.71429
Blaptica dubia	3	69.7	8.54481	4.28571
Calliphora vomitoria	1	107.2	13.1421	1.42857
Chrysoperla carnea	2	1.2	0.147113	2.85714
Cryptolaemus montrouzieri	4	44.7	5.47996	5.71429
Dacnusa sibirica	11	12.6	1.54469	15.7143
Dermestes haemorrhoidalis	1	44.1	5.4064	1.42857
Drosophila hydei	12	44	5.39414	17.1429
Drosophila melanogaster	6	10.4	1.27498	8.57143
Drosophila simulans	3	5.1	0.62523	4.28571
Drosophila yakuba	3	5.9	0.723305	4.28571
Encarsia formosa	4	0.5	0.061297	5.71429
Folsomia candida	2	0.5	0.061297	2.85714
Formica lemani	1	8	0.980753	1.42857
Formica rufa	3	50.3	6.16648	4.28571
Locusta migratoria	1	115.8	14.1964	1.42857
Macrolophus pygmaeus	3	6.5	0.796862	4.28571
Polygonia c-album	1	246.2	30.1827	1.42857
Porcellionides pruinosus	1	20.7	2.5377	1.42857
Tuberculatus annulatus	2	1.5	0.183891	2.85714
Aphidius colemani	0	0	0	0
Total	70	815.7	100	100
